# Supplementary material for: Human endogenous retrovirus K contributes to a stem cell niche in glioblastoma
Source: JCI journal article supplement (doi:10.1172/jci167929), 2023-07-02
Supplement: sd1 [file 1]

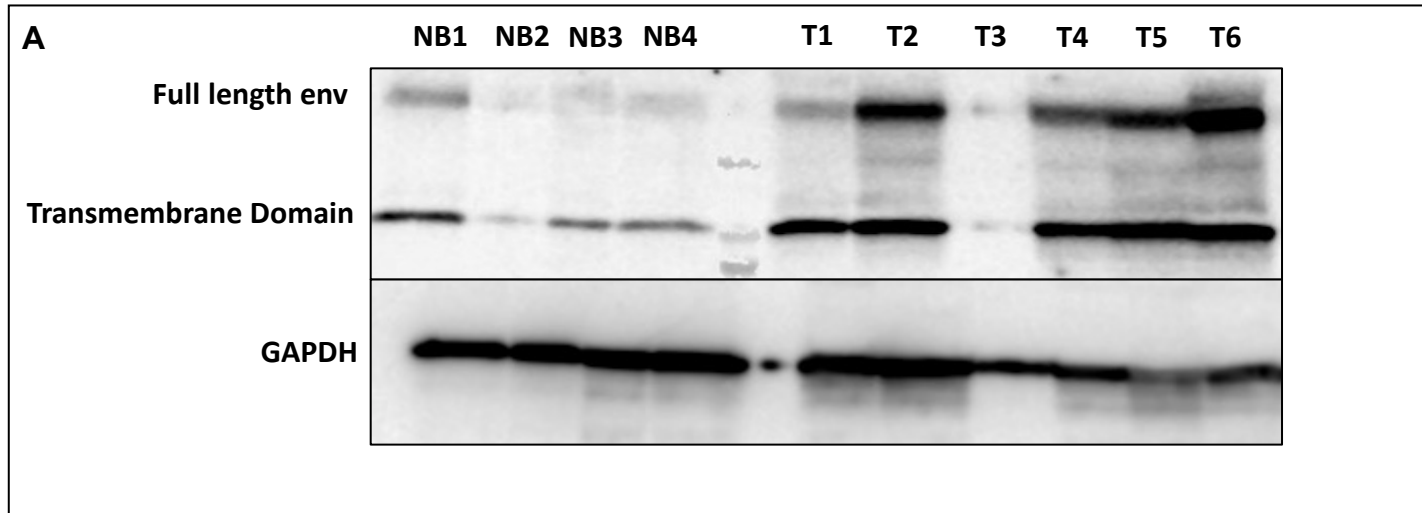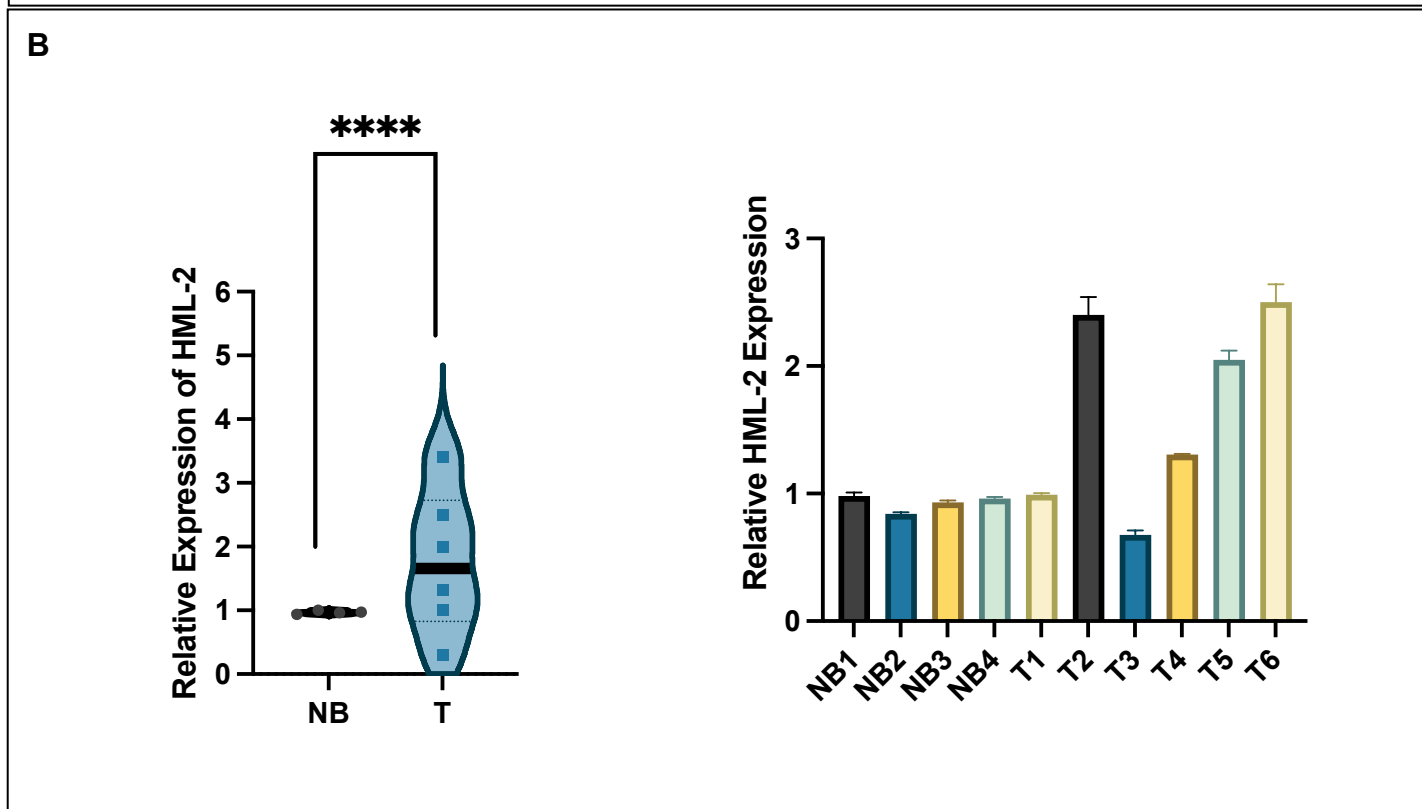

**Supplemental Figure 1.** HML-2 ENV protein is overexpressed in high-grade gliomas. A) Western blot of paired tumor and normal brain tissue shows increased expression of HML-2 ENV protein in high-grade glioma samples. B) Normalized Densitometry demonstrates statistically significant increased expression in glioma patients compared to matched normal brain specimens (p-value<0.0001, two-tailed t-test). Matched normal brain tissue group shows no significant difference in expression (p>0.05). T1=Recurrent GBM, T2=Newly Diagnosed GBM, T3=IDHm recurrent anaplastic astrocytoma, T4=Newly Diagnosed GBM, T5=Newly Diagnosed GBM, T6=Newly Diagnosed GBM.

G

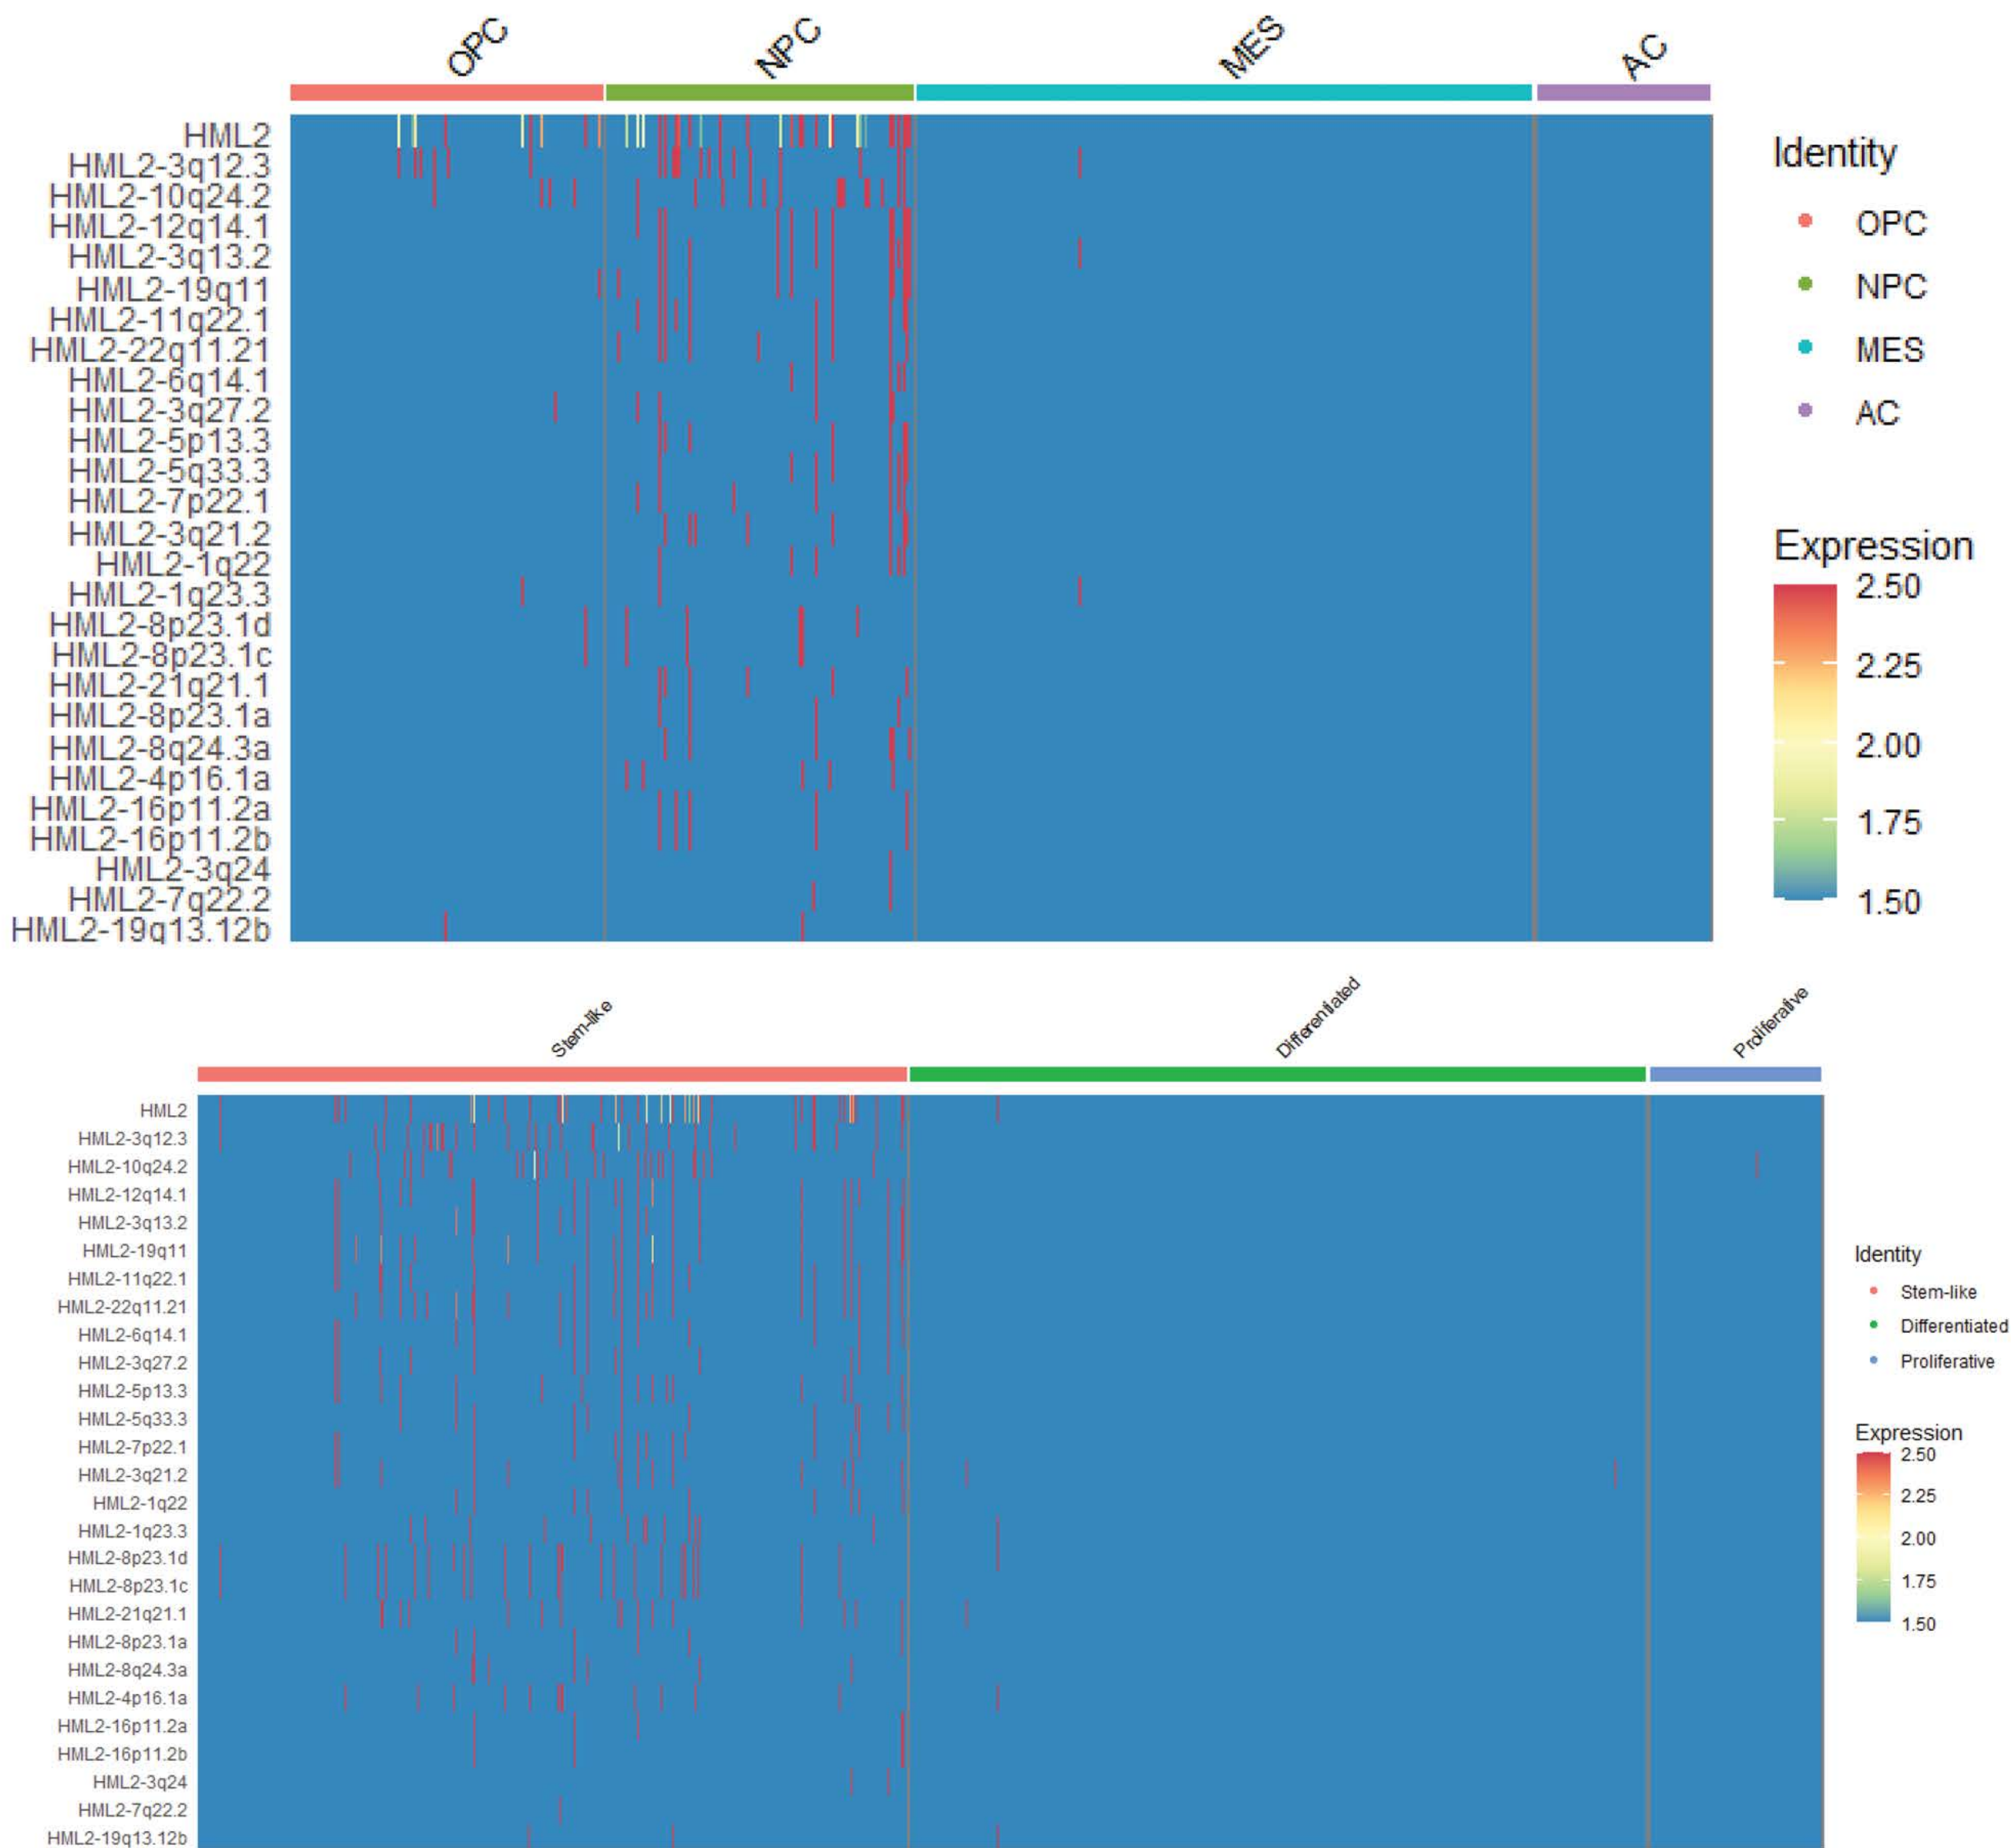

**Supplemental Figure 2.** Twenty-six unique HML-2 loci were identified that were uniquely enriched in NPC and stem cell-like populations.



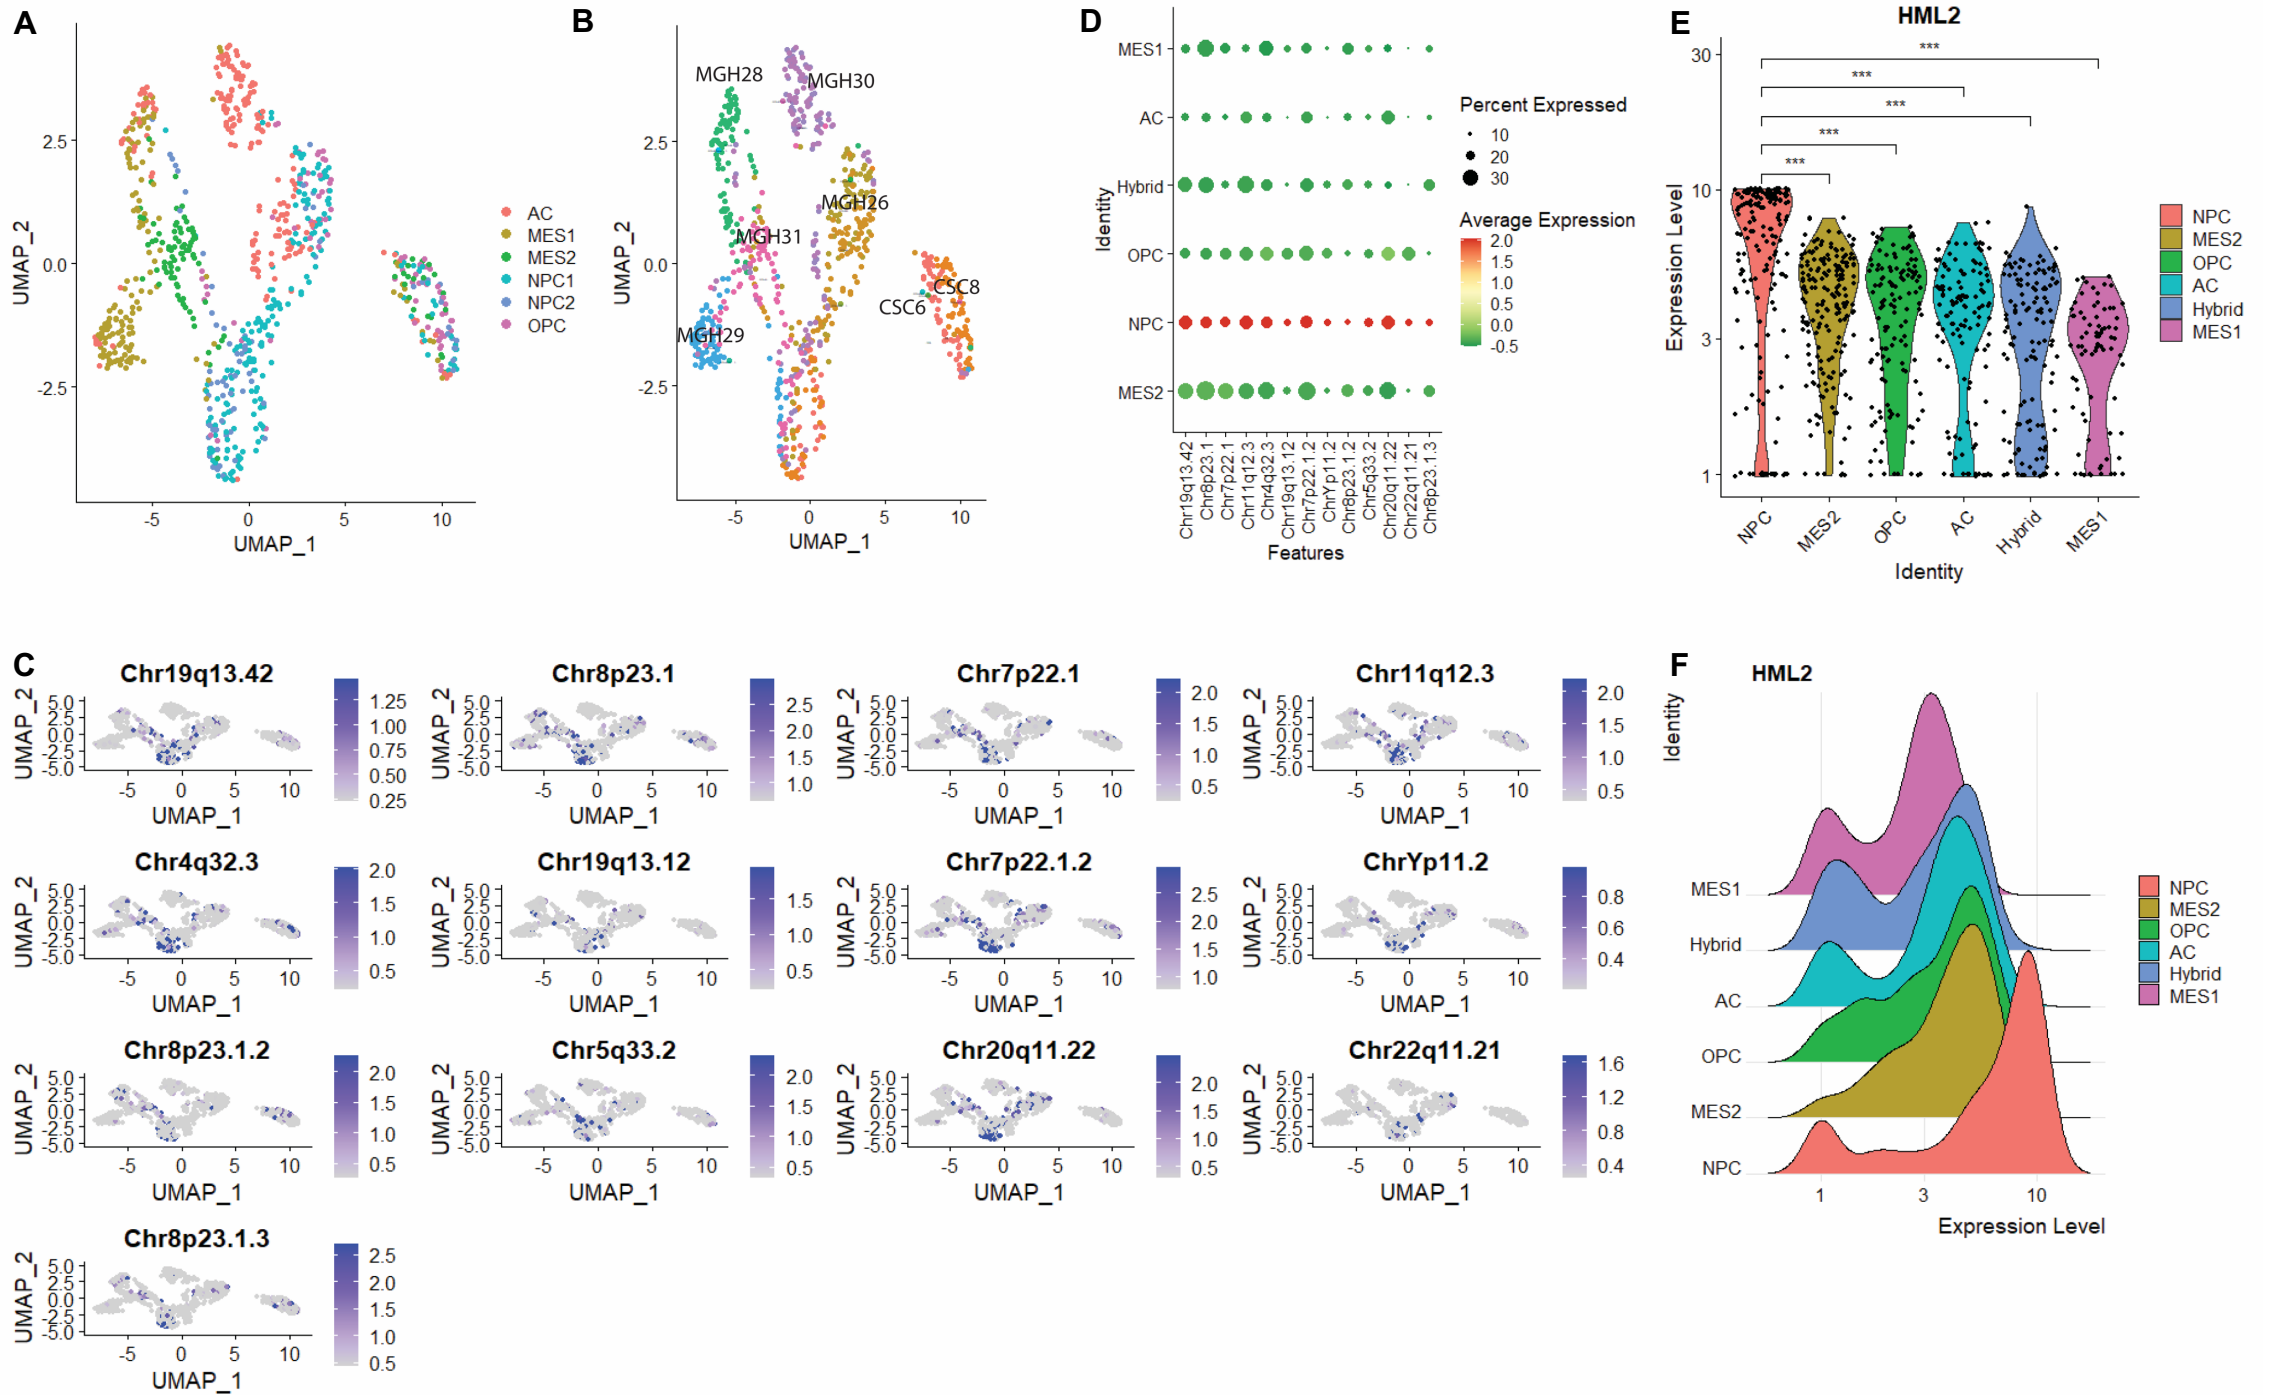

**Supplemental Figure 3.** HML-2 is differentially expressed in Neural Precursor-Like Cells. A-B) Unsupervised cluster analysis all HML-2 loci distinguish subpopulations of GBM cellular states, independent of parent tumor origin. C-D) Thirteen HML-2 loci (Chr19q13.42, Chr8p23.1-3, Chr7p22.1-2, Chr11q12.3, Chr4q32.3, Chr19q13.12, ChrYp11.2, Chr5q33.2, Chrq11.22, Chr22q11.21) demonstrated significant enrichment with NPC-like subpopulations, included two loci with tandem repeats at Chr7p22 and Chr8p23. Within our NPC subpopulations, we identified five differentially expressed HERV-K loci with preserved LTR5Hs: *ERV-3697915 (7p22)* *ERV-2427227(22q11)*, *ERV-610406(11q12.3)*, *ERV\_2925064(4q32.3)*, *ERV-3697923(7p22.1)*. One loci contains a near-full-length provirus with all coding genes (*ERV\_3697915,7p22*) that map to cell subpopulations in our dataset. E-F) Unsupervised clustering analysis for summary expression of all HML-2 ORF loci distinguishes NPC-like cellular subpopulations independent of tumor origin. (ANOVA, multiple-testing correction,  $p < 0.001$ ).

**A**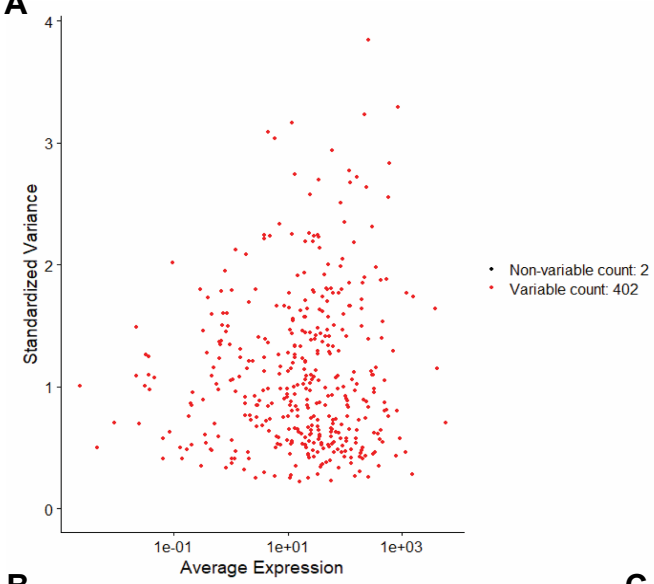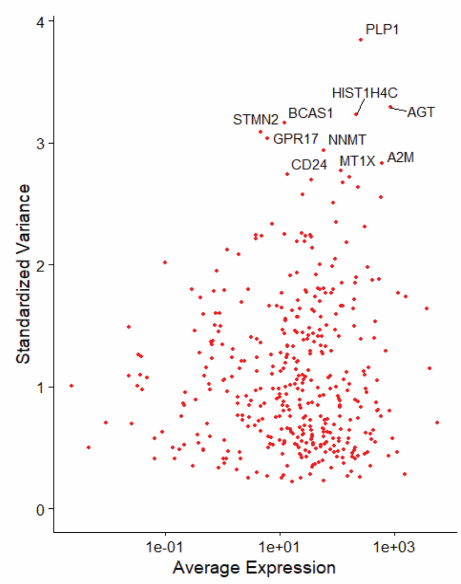**B**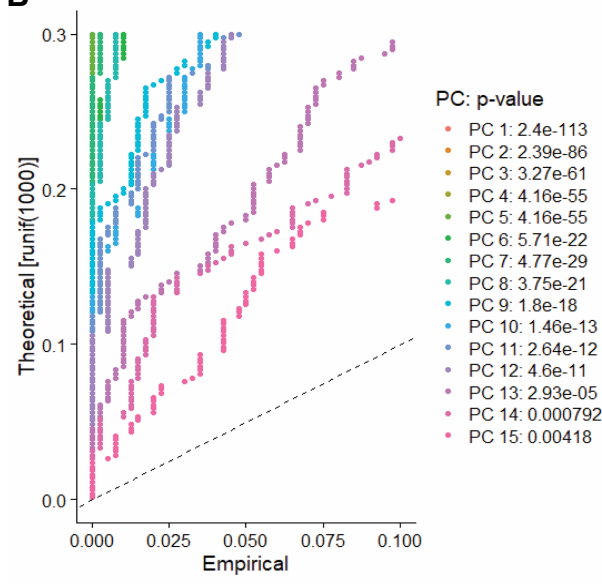**C**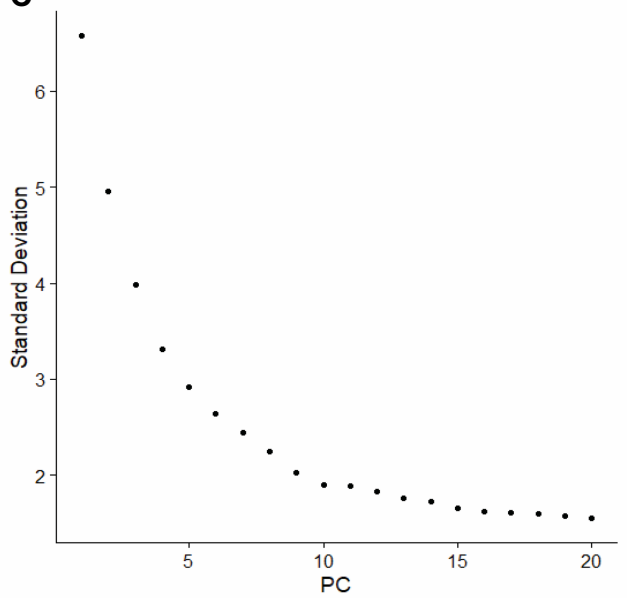**D**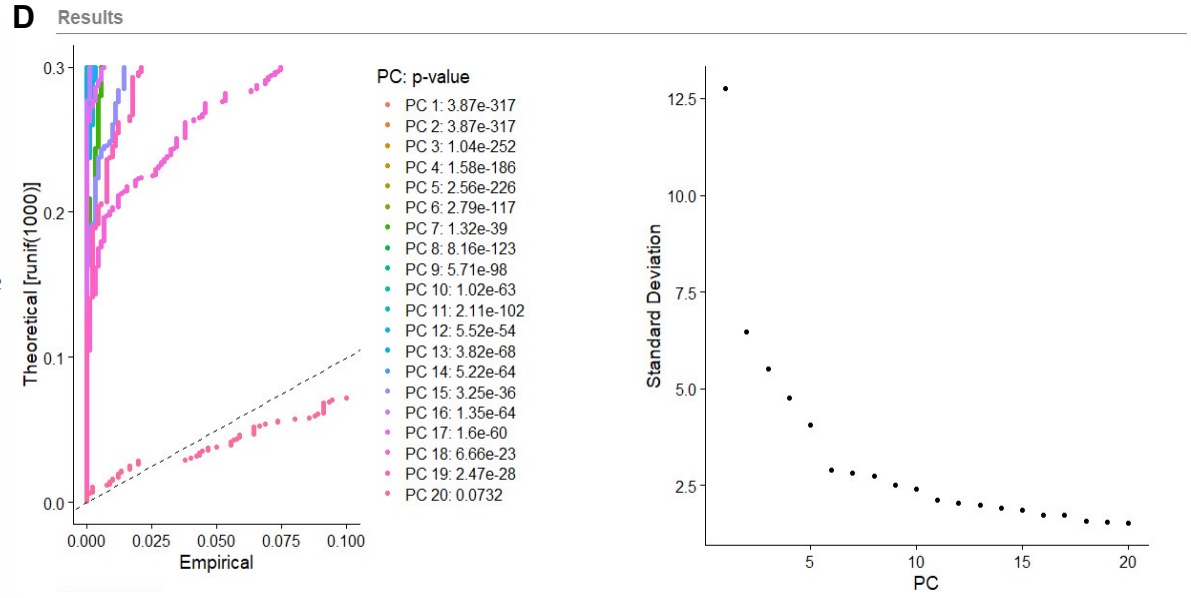

**Supplemental Figure 4.** A) Exploratory analysis of variable genes in our dataset. *PLP1*, *HIST14C*, *AGT*, *BCAS1*, *STMN2*, *GPR17*, *NMNT*, *CD24*, *MTIX*, *A2M*. B) Distribution of p-values for individual principal components relative to uniform distribution (dashed line) C) Percentage of variance explained by individual principal components. The notable inflection point at 10 PC's, suggests that the majority of true signal is explained within the first 10 PC's.

MES2

NPC

OPC

Hybrid

AC

MES1

HML2

HILPDA

AKAP12

SLC2A3

LGALS3

MELK

GATM

TNR

SPAG5

NKAIN4

BCAN

FABP7

OLIG1

ATP1A2

SLC1A3

HEPN1

AQP4

C3

SERPINA3

C1S

CHI3L1

Expression

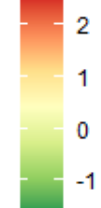

Identity

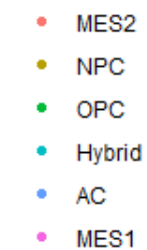



**Supplemental Figure 5.** Heatmap of differentially expressed genes with respect to cluster identity.  
Relative expression of HML-2 ORF Loci is highly expressed within NPC-like cells.

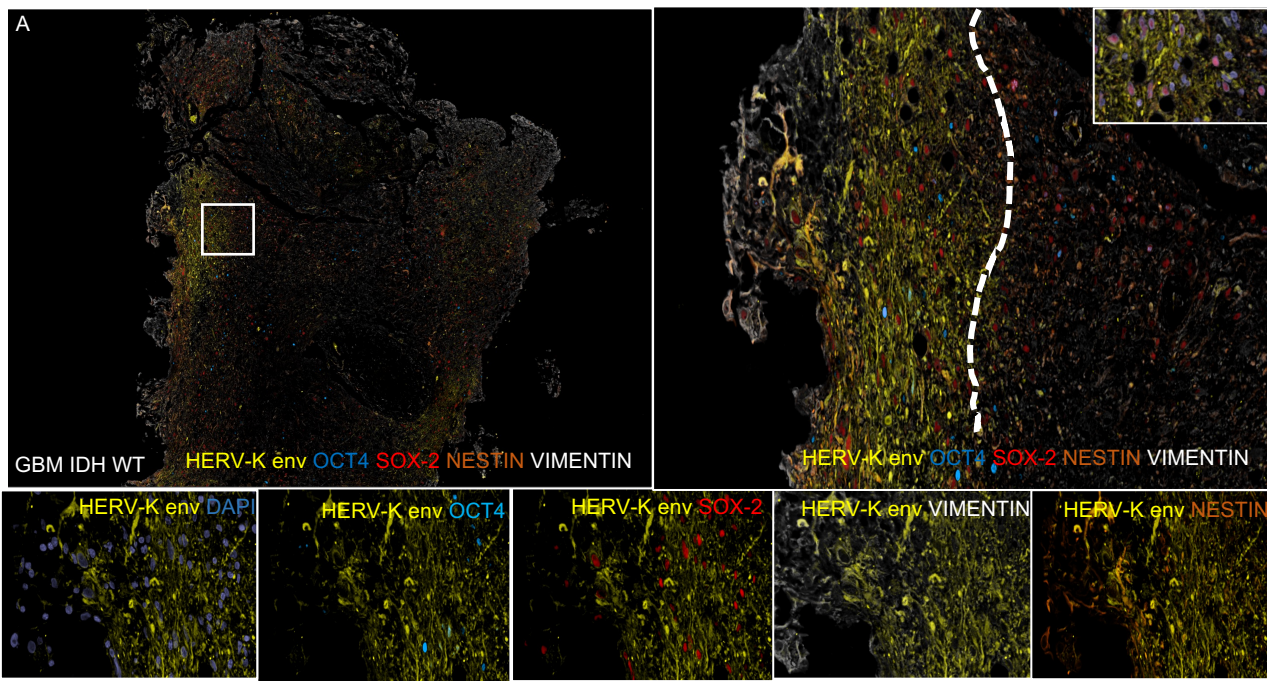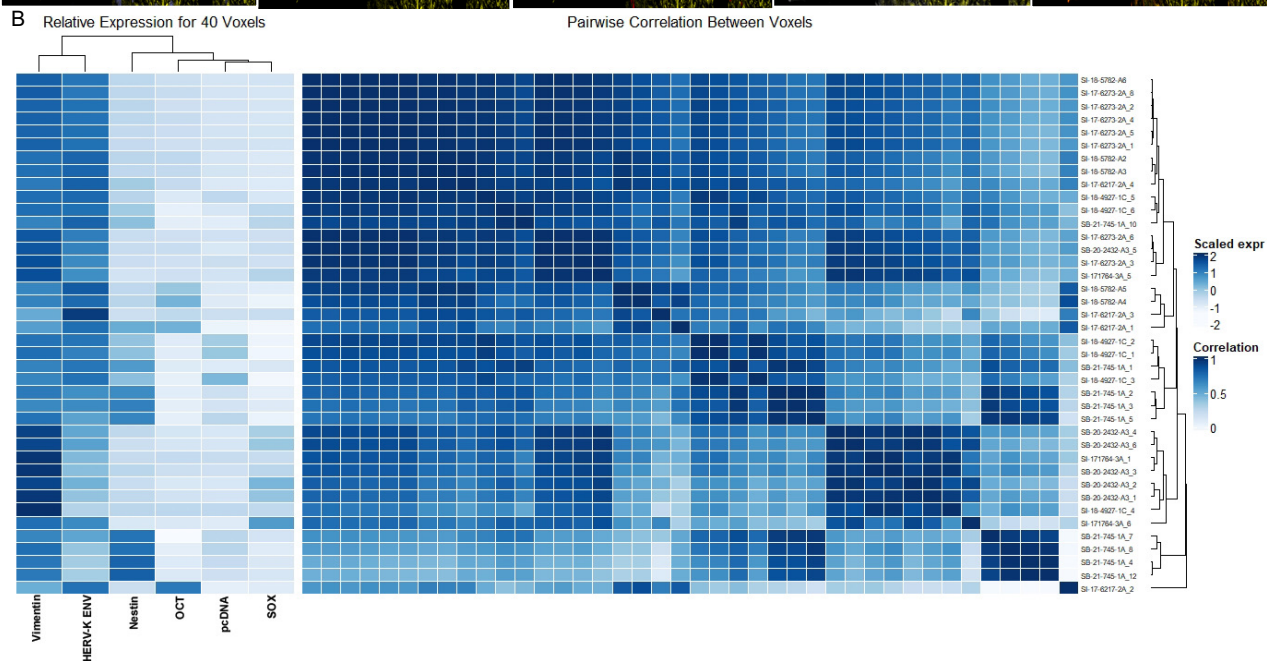

**Supplemental Figure 6.** HML-2 protein expression correlates to expression of stem-cell markers. (A). Using 11-plex whole slide immunofluorescence, glioma stem-cell markers and HERV-K localized to stem-cell rich areas containing abundant OCT4, Sox2, Nestin, and Vimentin expression in IDH wild-type Glioblastoma. (B). Using automated quantification algorithm, cross-sectional expression of HERV-K envelope protein, OCT4, Sox2, Nestin, PCNA, and Vimentin demonstrated significant correlations across randomly generated voxels.

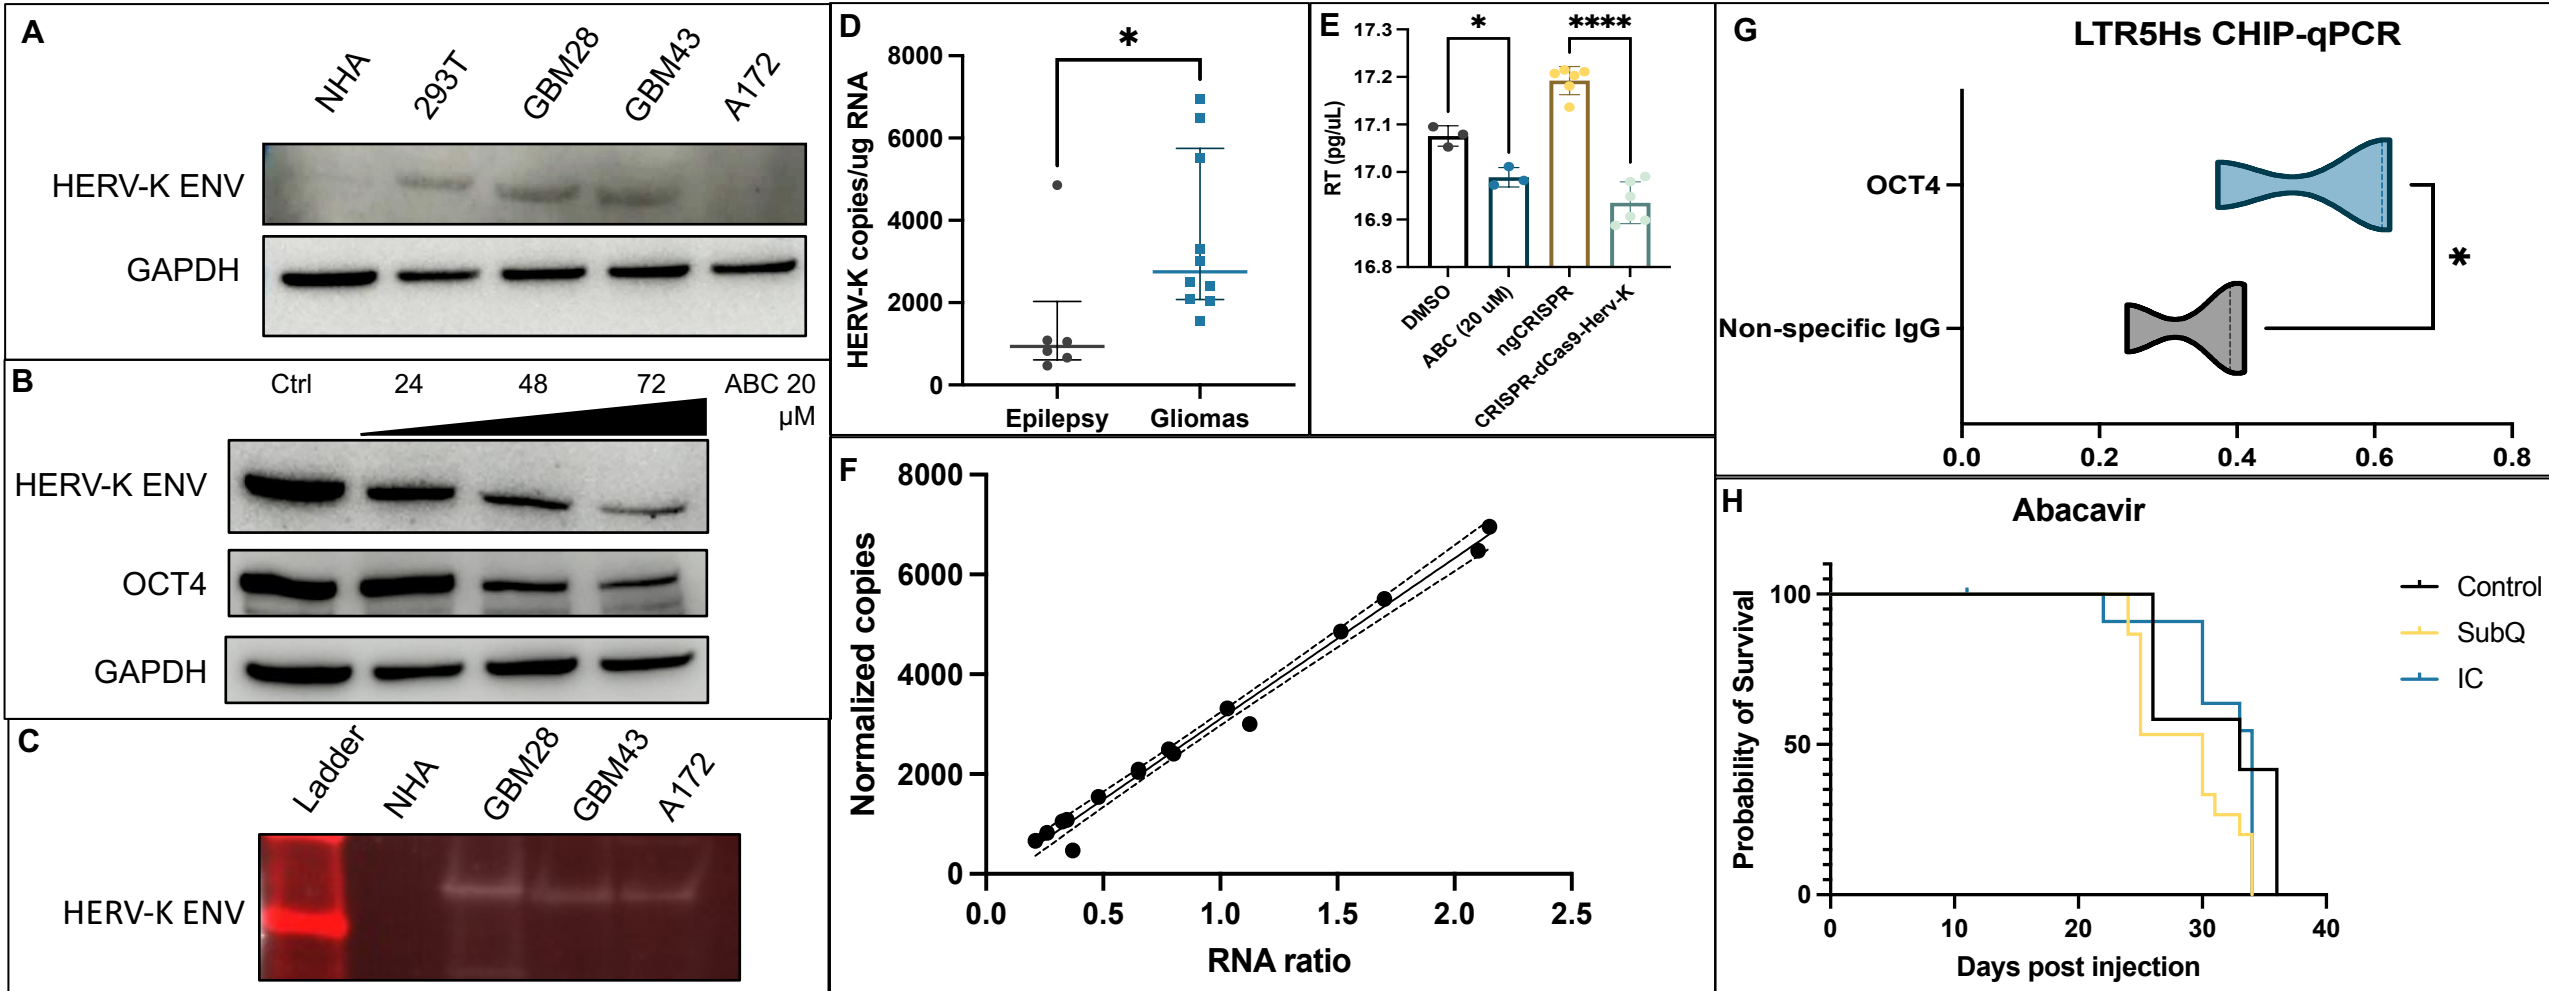

**Supplemental Figure 7.** A) Western Blot demonstrating that HERV-K ENV is preferentially expressed in Glioblastoma Neurospheres (GBM28 and GBM43) and not in normal human astrocytes (NHA). B) Western Blot demonstrating reduced HERV-K ENV and OCT4 protein expression over 72 hours with exposure to 20 uM of abacavir. C) Extracellular vesicles containing HERV-K ENV can be isolated from the supernatant of Glioblastoma Cells. . D) Normalized copies of HERV-K env RNA in glioma samples is increased compared to control epilepsy samples ( $p < 0.011$ , Mann-Whitney test). E) Treatment with Abacavir (20 uM) and CRISPR-dCas9 reduces extracellular levels of reverse transcriptase compared to DMSO ( $p < 0.05$ , t-test) and ngCRISPR respectively ( $p < 0.0001$ , t-test). PERT was performed as biological triplicate. F) HERV-K RNA ratio directly correlates to normalized copies of HERV-K/ug of RNA. G) CHIP-qPCR validates OCT4 binding to HERV-K LTR5Hs in high HERV-K cell line GBM28 compared to non-specific IgG control. No significant change was noted in the GBM43 cell line with correspondingly less endogenous OCT4 expression. H) Local delivery of abacavir improves survival compared to subcutaneous delivery of abacavir and local saline-treated group in patient-derived murine xenograft model(  $p < 0.03$ , Mantel-Cox Test).



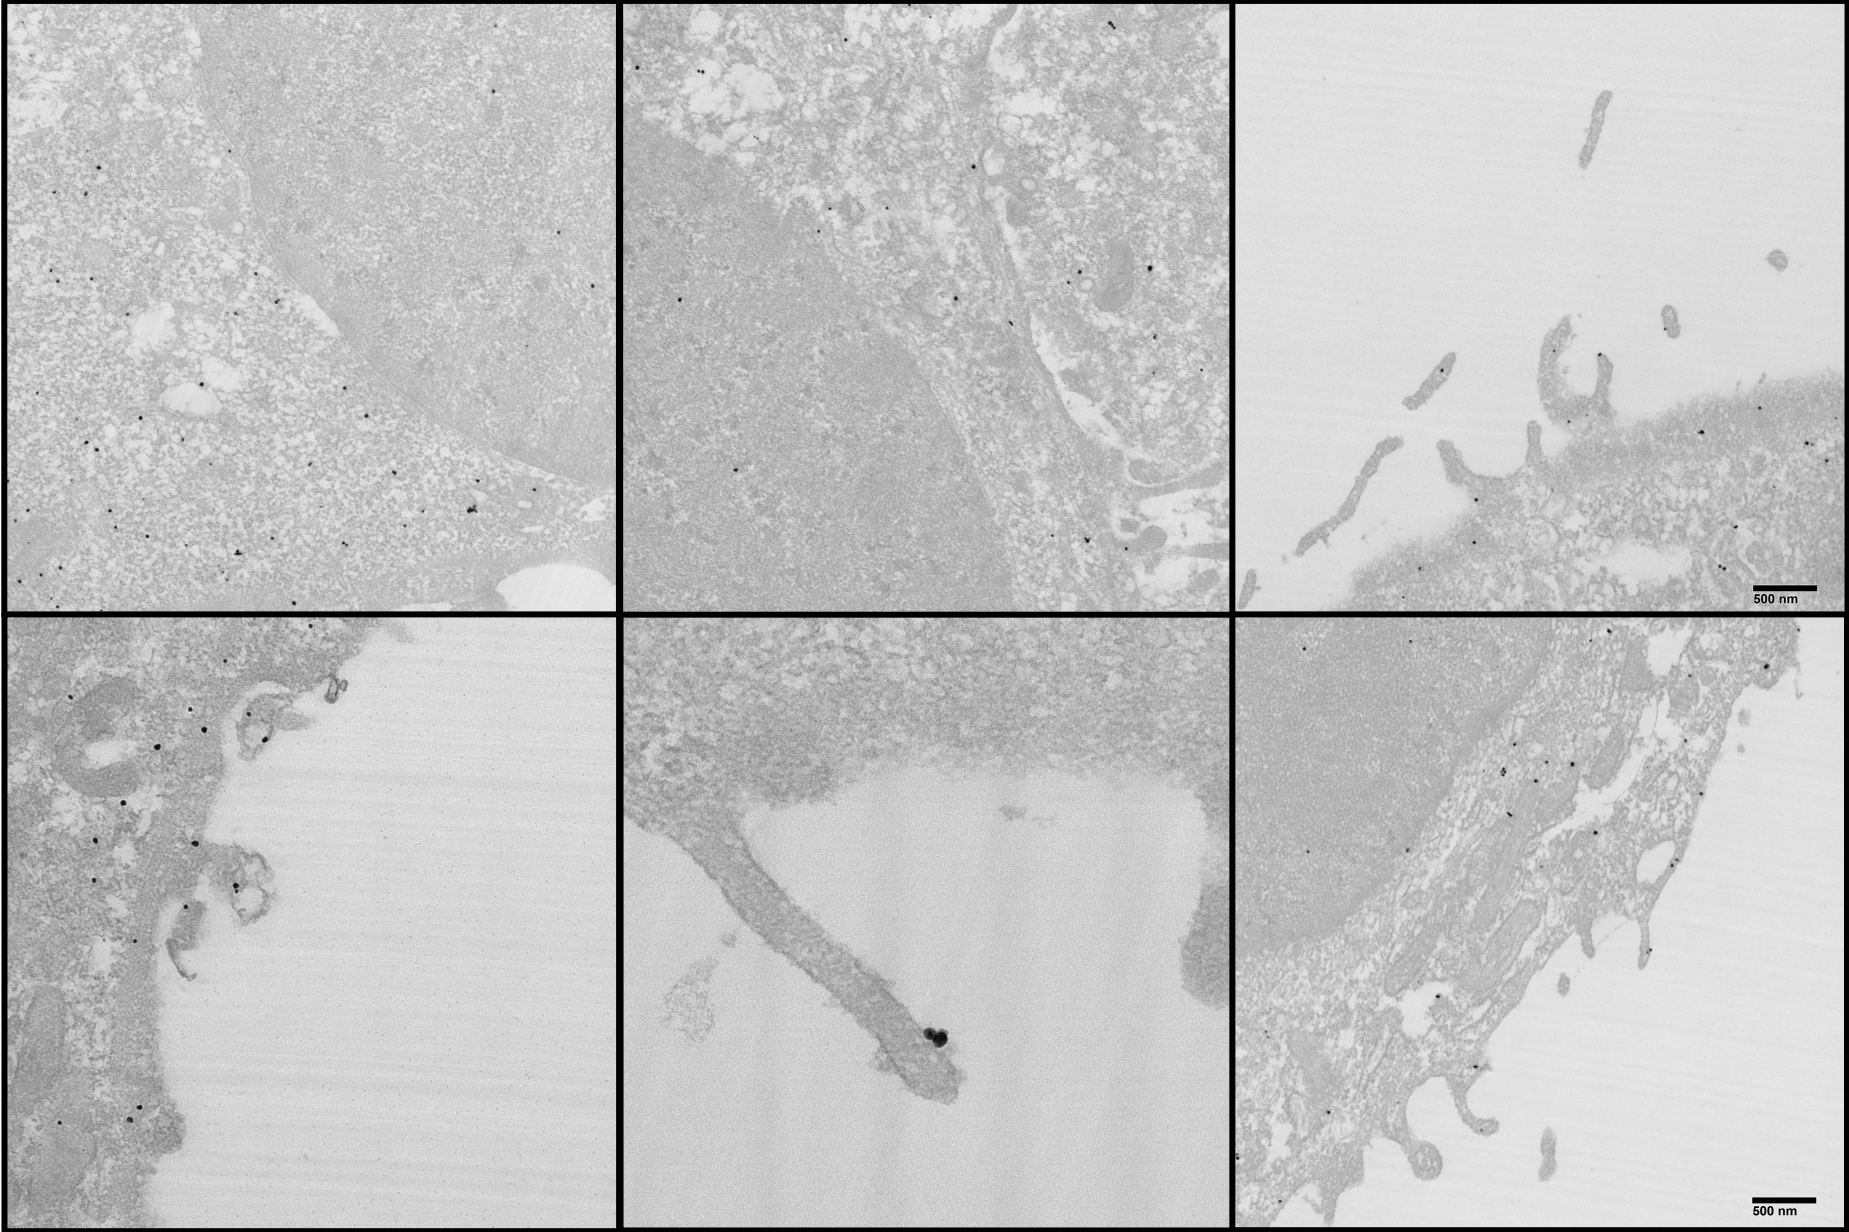

**Supplemental Figure 8.** Transmission Electron Microscopy reveals evidence of perinuclear  
HERV-K envelope expression. Additionally, HERV-K envelope protein can be found in the Golgi  
vesicles and within microvillous plasma membrane extensions in patient-derived glioma cells.  
Images taken at 10000X magnification



**Supplemental Figure 9.** Gene network analysis of overexpressed genes in GBM tissue relative to normal cortical tissue (A). Association of overexpressed genes in GBM tissue relative to normal cortical tissue in the context of maintaining pluripotency of stem cells (B).

1

Patient-derived Glioma  
Neurospheres

CRISPR-dCas9  
HERV-K

**Electroporation of Neurospheres**

2

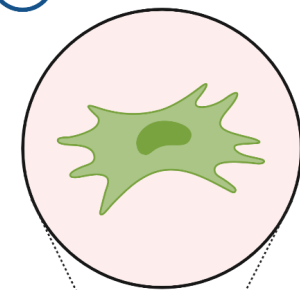

**Cellular Recovery**

3

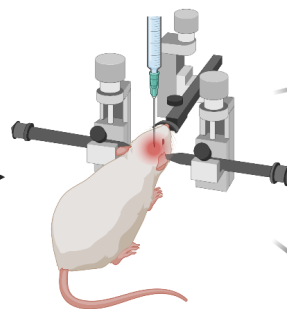

4

Tissue  
collection

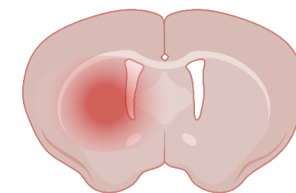

Survival  
Analyses

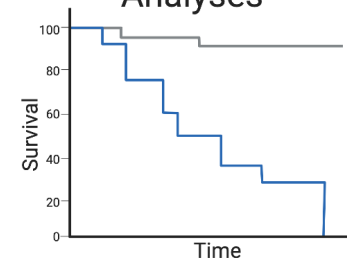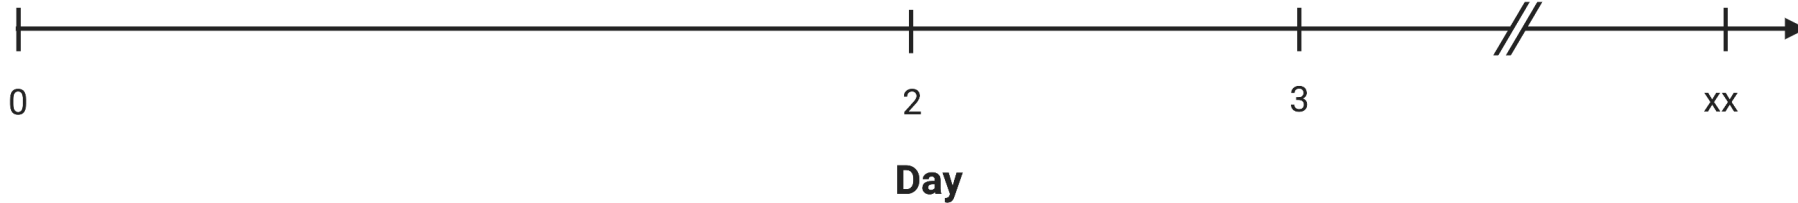



**Supplemental Figure 10.** Glioma neurospheres were transfected via electroporation and allowed to recover for 3 days prior to stereotactic injection. Transfected neurospheres were implanted into the right frontal lobe of nude athymic mice (n=10 mice each group, 2E5cells/2 uL).

# Automated Immunofluorescence Quantification

## ① Multivoxel Segmentation

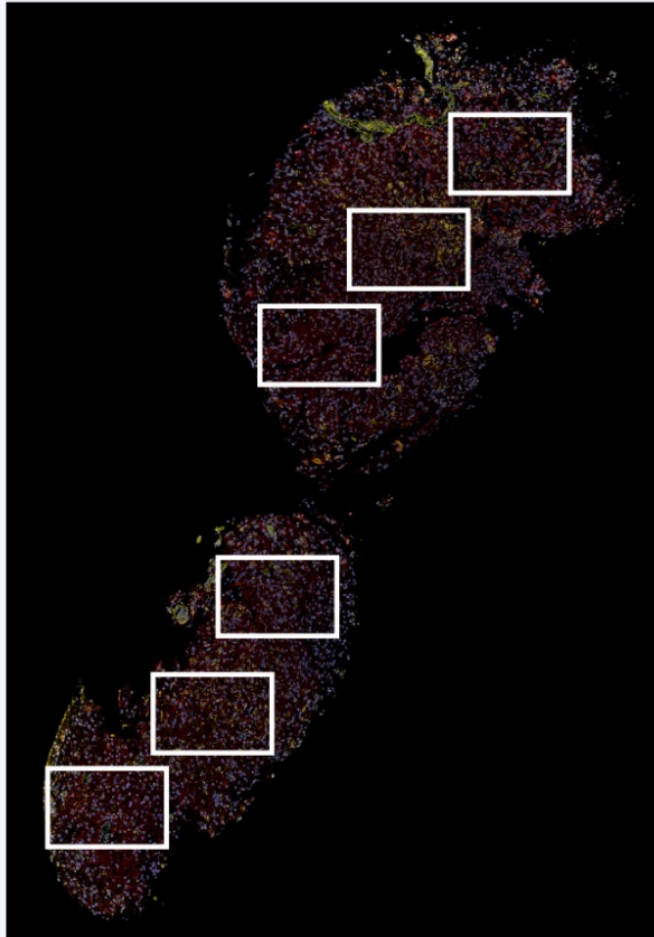

## ② Mosaic Image Reconstruction

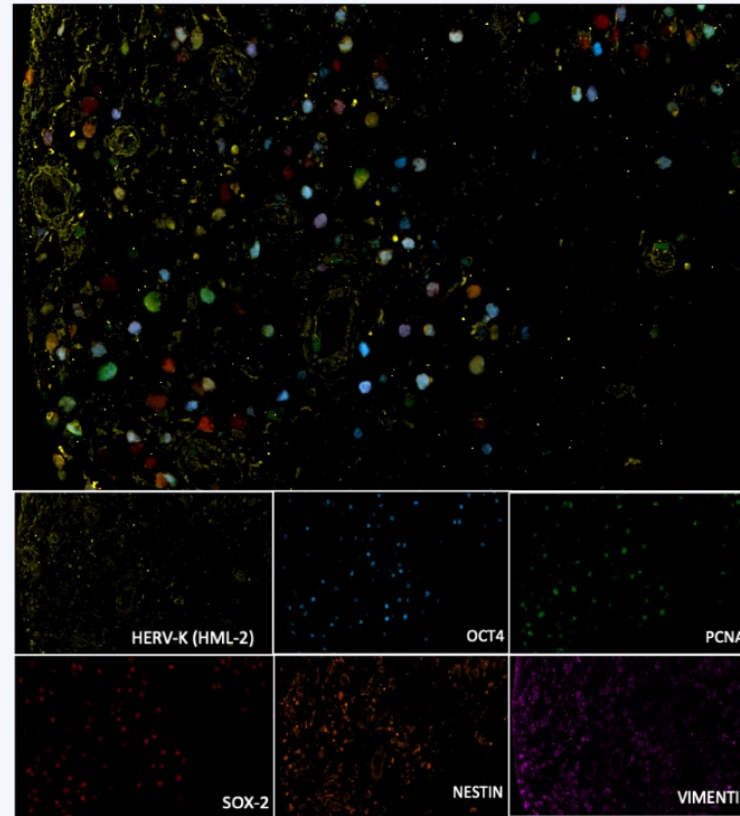

## ③ Image Processing and Analysis

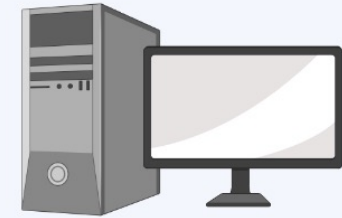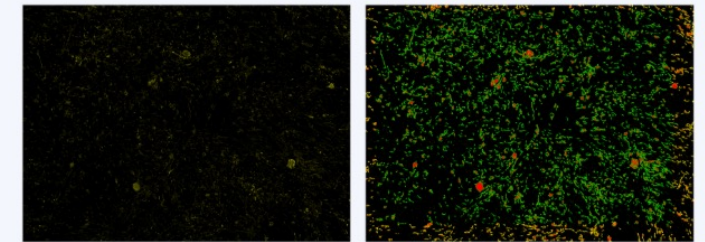

HERV-K ENV

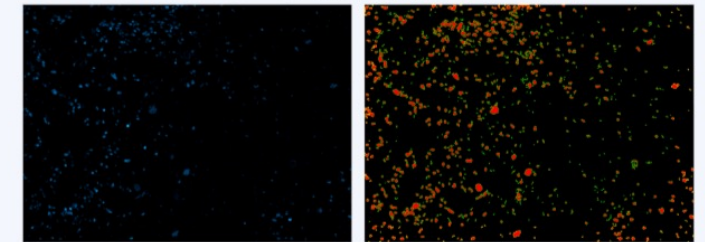

OCT4

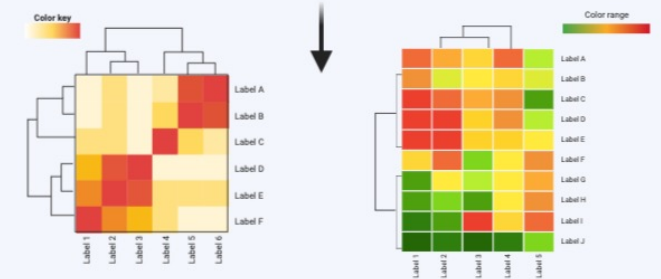

1 **Supplemental Figure 11.** Automated Fluorescence Quantification Pipeline can be utilized to  
2 quantify fluorescence expression per voxel. Primarily, whole-slide multiplex immunofluorescence  
3 slides were randomly segmented and mosaic images were reconstructed for each fluorophore.  
4 Images were subsequently processed using an automated algorithm for each protein and total  
5 surface area of protein expression was quantified.

6

7

**Supplemental Table 1**

| Patient | Age | Sex | Pathology                                          | Recurrence | IDHm<br>R132 | Proliferative<br>index | Tissue<br>Sample | HERVK+<br>on IF |
|---------|-----|-----|----------------------------------------------------|------------|--------------|------------------------|------------------|-----------------|
| 1       | 49  | F   | Diffuse Astrocytoma<br>(WHO Grade II)              | No         | +            | 4-5%                   | Tumor            | -               |
| 2       | 79  | M   | Glioblastoma<br>(WHO Grade IV)                     | No         | -            | 20-25%                 | Tumor            | ++              |
| 3       | 50  | M   | Glioblastoma<br>(WHO Grade IV)                     | No         | -            | 50-55%                 | Tumor            | ++              |
| 4       | 68  | M   | Glioblastoma<br>(WHO Grade IV)                     | Yes        | -            | NP                     | Tumor            | -               |
| 5       | 39  | M   | Glioblastoma<br>(WHO Grade IV)                     | Yes        | -            | 1-6%                   | Tumor            | ++              |
| 6       | 40  | M   | Anaplastic<br>Astrocytoma (WHO<br>Grade III)       | No         | +            | 10-15%                 | Tumor<br>CSF     | -               |
| 7       | 31  | F   | Anaplastic<br>Astrocytoma (WHO<br>Grade III)       | Yes        | +            | 40-50%                 | Tumor<br>CSF     | +               |
| 8       | 60  | M   | Glioblastoma<br>(WHO Grade IV)                     | Yes        | -            | NP                     | Tumor            | ++              |
| 9       | 79  | M   | Glioblastoma<br>(WHO Grade IV)                     | Yes        | -            | NP                     | Tumor            | -               |
| 10      | 44  | M   | Glioblastoma<br>(WHO Grade IV)                     | No         | -            | NP                     | Tumor            | -               |
| 11      | 60  | M   | Glioblastoma<br>(WHO Grade IV)                     | Yes        | -            | 8-10%                  | Tumor            | +               |
| 12      | 31  | M   | Glioblastoma<br>(WHO Grade IV)                     | Yes        | -            | 20%                    | Tumor            | -               |
| 13      | 30  | F   | Anaplastic<br>Oligodendroglioma<br>(WHO Grade III) | No         | +            | 15%                    | Tumor<br>CSF     | +               |
| 14      | 69  | M   | Glioblastoma                                       | Yes        | -            | 12-15%                 | Tumor<br>CSF     | ++              |
| 15      | 41  | M   | Glioblastoma<br>(WHO Grade IV)                     | Yes        | +            | 15-30%                 | Tumor<br>CSF     | NA              |

|    |    |   |                                              |     |   |        |              |    |
|----|----|---|----------------------------------------------|-----|---|--------|--------------|----|
| 16 | 54 | M | Anaplastic<br>Astrocytoma (WHO<br>Grade III) | Yes | + | 10-15% | CSF          | NA |
| 17 | 39 | F | Anaplastic<br>Oligodendroglioma              | No  | + | 2%     | Tumor<br>CSF | NA |
| 18 | 46 | M | Diffuse Astrocytoma<br>(Grade II)            | No  | - | -      | Tumor<br>CSF | NA |
| 19 | 44 | M | Anaplastic<br>Oligodendroglioma              | No  | + | -      | CSF          | NA |
| 20 | 50 | F | Glioblastoma (WHO<br>Grade IV)               | Yes | - | -      | Tumor        | NA |
| 21 | 39 | M | Anaplastic<br>Oligodendroglioma              | Yes | + | -      | Tumor        | NA |
| 22 | 55 | M | Glioblastoma (WHO<br>Grade IV)               | Yes | - | -      | Tumor        | NA |



| Stem-like versus Differentiated |        |              | Neural Progenitor Cells (NPCs) versus Astrocytes (ACs) |        |              |
|---------------------------------|--------|--------------|--------------------------------------------------------|--------|--------------|
| Locus                           | log2FC | Adj. p-value | Locus                                                  | log2FC | Adj. p-value |
| HML2-10q24.2                    | 1.29   | p<0.0001     | HML2-1q22                                              | 1.95   | p<0.0001     |
| HML2-3q12.3                     | 2.07   | p<0.0001     | HML2-1q23.3                                            | 1.44   | p<0.0001     |
| HML2-19q11                      | 1.95   | p<0.0001     | HML2-11q22.1                                           | 2.11   | p<0.0001     |
| HML2-12q14.1                    | 1.38   | p<0.0001     | HML2-12q14.1                                           | 2.41   | p<0.0001     |
| HML2-3q13.2                     | 1.29   | p<0.0001     | HML2-19q11                                             | 2.69   | p<0.0001     |
| HML2-22q11.21                   | 1.45   | p<0.0001     | HML2-22q11.21                                          | 2.21   | p<0.0001     |
| HML2-11q22.1                    | 1.35   | p<0.0001     | HML2-3q13.2                                            | 2.18   | p<0.0001     |
| HML2-5p13.3                     | 1.15   | p<0.0001     | HML2-3q27.2                                            | 1.62   | p<0.0001     |
| HML2-8p23.1d                    | 1.59   | p<0.0001     | HML2-5p13.3                                            | 1.78   | p<0.0001     |
| HML2-3q21.2                     | 1.20   | p<0.0001     | HML2-5q33.3                                            | 1.85   | p<0.0001     |
| HML2-8p23.1c                    | 1.46   | p<0.0001     | HML2-6q14.1                                            | 1.65   | p<0.0001     |
| HML2-5q33.3                     | 1.14   | p<0.0001     | HML2-7p22.1                                            | 1.54   | p<0.0001     |
| HML2-1q22                       | 1.15   | p<0.0001     | HML2-8p23.1a                                           | 1.27   | p<0.0001     |
|                                 |        |              | HML2-8q24.3a                                           | 1.27   | p<0.0001     |
|                                 |        |              | HML2-3q12.3                                            | 1.47   | p<0.0001     |
|                                 |        |              | HML2-21q21.1                                           | 1.37   | p<0.0001     |
|                                 |        |              | HML2-10q24.2                                           | 1.27   | p<0.0001     |
|                                 |        |              | HML2-8p23.1c                                           | 1.17   | p<0.0001     |
|                                 |        |              | HML2-8p23.1d                                           | 1.23   | p<0.0001     |

**Supplemental Table 2.** Comparison of overexpressed HML2 loci according to Johnson-Verhaak and Neftel states, respectively. In each instance, HML2 locus expression in stem-like or progenitor cells is compared to that of terminally differentiated cells.

**Supplemental Table 3.** Summary of HML-2 loci significantly overexpressed in NPC cells relative to mesenchymal cells (MES)

| Element               | Locus       | log2FC | Adj. p-value |
|-----------------------|-------------|--------|--------------|
| ERV-127104-LTR5-Hs    | Chr1q21.3   | 5.75   | 0.0004       |
| ERV-2578677-LTR5-Hs   | Chr3q12.3   | 7.20   | 0.0007       |
| ERV-1888790-LTR5-Hs   | Chr19q13.12 | 6.12   | 0.002        |
| ERV-3052630-HERVK-int | Chr4q35.2   | 6.28   | 0.008        |
| ERV-1822930-LTR5-Hs   | Chr19p12    | 3.50   | 0.04         |

**Supplemental Table 4.** Total HML-2 expression in NPC cells relative to those of other transcriptional states.

| Transcriptional State | log2FC | Adj p-value |
|-----------------------|--------|-------------|
| AC                    | 5.54   | <0.00001    |
| MES1                  | 7.87   | <0.00001    |
| MES2                  | 5.08   | <0.00001    |
| OPC                   | 5.38   | <0.00001    |

**Location of HERV-K (HML-2) active loci on scRNA-seq**

| <b>HERVd<br/>Nomenclature</b> | <b>Locus</b> | <b>HML-2<br/>Strand</b> | <b>Sequence<br/>Length (bp)</b> | <b>HML-2 Consensus<br/>Missing bp</b> | <b>Transcript alignment to<br/>full length HML-2 Genes</b> |
|-------------------------------|--------------|-------------------------|---------------------------------|---------------------------------------|------------------------------------------------------------|
| ERV-1853911                   | 19q13        | +                       | 5,697                           | 3,921 (45.9%)                         | LTR5B, RNaseH, Env,<br>Rec                                 |
| ERV-3925927                   | 8p23.1       | -                       | 9,528                           | 173 (1.8%)                            | LTR5HA, Integrase,<br>Protease                             |
| ERV-610406                    | 11q12.3      | -                       | 14,601                          | 71(0.8%)                              | LTR5Hs, Integrase,<br>Np9, Protease, RNaseH                |
| ERV-3697915                   | 7p22         | -                       | 15,438                          | 189 (2.1%)                            | LTR5Hs, LTR45C,<br>Gag, Integrase, Env,<br>RNaseH, Rec     |
| ERV_2925064                   | 4q32.3       | +                       | 12,534                          | 2628 (27.7%)                          | LTR5Hs, Np9                                                |
| ERV-1887448                   | 19q13.12     | -                       | 4,006                           | 3,855 (51.2%)                         | Integrase, Rec                                             |
| ERV_3697923                   | 7p22.1       | -                       | 8,408                           | 97 (1.14%)                            | LTR5Hs, Gag, Protease,<br>RNaseH, Integrase                |
| ERV_4438050                   | Yp11.2       | -                       | 6,944                           | 1,629 (19.0%)                         | LTR5A, Integrase                                           |
| ERV_3798887                   | 8p23.1       | +                       | 9,522                           | 92 (0.9%)                             | LTR5A, Integrase,<br>Protease                              |
| ERV_3292433                   | 5q33.2       | -                       | 8,703                           | 917 (9.6%)                            | LTR5B, Protease                                            |
| ERV_2289356                   | 20q11.22     | +                       | 9,635                           | 2,755(28.9%)                          | LTR5B, RNaseH                                              |
| ERV_2427227                   | 22q11.21     | +                       | 9,175                           | 384 (4.1%)                            | LTR5Hs, Gag,<br>Integrase, Np9,<br>Protease, RNaseH        |
| ERV_3926052                   | 8p23.1.3     | -                       | 9,516                           | 91 (1.0%)                             | LTR5A, Integrase, Rec                                      |
| ERV_749060                    | 11q22.1      | +                       | 9,466                           | 164 (1.73%)                           | LTR5HS, Env, Gag,<br>Pol, Integrase, Rec,<br>RNaseH        |
| ERV_1882163                   | 19q11        | -                       | 8,864                           | 80 (0.94%)                            | LTR5Hs, Env, Gag, Pol,<br>Rec, Protease, RT                |

|             |        |   |       |             |                                           |
|-------------|--------|---|-------|-------------|-------------------------------------------|
| ERV_2599259 | 3q21.2 | + | 9,138 | 343 (3.62%) | LTR5HS, Env, Gag,<br>Protease Rec, RNaseH |
|-------------|--------|---|-------|-------------|-------------------------------------------|

**Supplemental Table 5**

**Supplemental Table 6**

| <b>Chromosome</b> | <b>Start</b> | <b>End</b> | <b>Width</b> | <b>Strand</b> | <b>Gene ID</b> | <b>Function</b>                                                               |
|-------------------|--------------|------------|--------------|---------------|----------------|-------------------------------------------------------------------------------|
| Chr 1             | 150618701    | 150669672  | 50972        | -             | GOLPH3L        | Golgi Trafficking                                                             |
| Chr 1             | 155629233    | 155755165  | GOLPH3L      | -             | YY1AP1         | Cell Cycle Regulation,<br>Chromatin Remodeling,<br>Transcriptional Regulation |
| Chr 3             | 125898908    | 125929011  | 30104        | +             | ALDH1L1-AS2    | lncRNA                                                                        |
| Chr 3             | 101659703    | 101716770  | 57068        | +             | RDUR           | RIG-I Dependent Antiviral<br>Response Regulator RNA,<br>lncRNA                |
| Chr 3             | 113005777    | 113160361  | 154585       | -             | CFAP44         | Microtubule Cytoskeleton<br>Organization                                      |
| Chr 4             | 68566996     | 68946669   | 379674       | +             | UBA6-DT        | Ubiquitination and<br>Proteasomal Degradation                                 |
| Chr 5             | 136310987    | 136835018  | 524032       | -             | SPOCK1         | Proteoglycan Protein Core                                                     |
| Chr 8             | 139142266    | 139509065  | 366800       | -             | FAM135B        | Cellular Lipid Metabolism                                                     |
| Chr 8             | 12394588     | 12523120   | 128533       | -             | LOC729732      | lncRNA                                                                        |
| Chr 9             | 136627016    | 12523120   | 230431       | -             | VAV2           | Guanine Nucleotide<br>Exchange Factor                                         |
| Chr 11            | 62369691     | 62380237   | 10547        | -             | EML3           | Microtubule Binding<br>Activity                                               |
| Chr 11            | 62382768     | 62389647   | 6880         | -             | B3GAT3         | Glucuronyltransferase                                                         |
| Chr 11            | 62360675     | 62369312   | 8638         | -             | MTA2           | Nucleosome Remodeling                                                         |
| Chr 12            | 58325232     | 58329947   | 4716         | -             | GIHCG          | lncRNA, Associated with<br>Hepatocellular Carcinoma                           |
| Chr 19            | 35549963     | 35597208   | 47246        | -             | HPN-AS1        | lncRNA                                                                        |
| Chr 19            | 20278023     | 20311299   | 33277        | +             | ZNF486         | DNA-binding<br>Transcription Factor<br>Activity                               |
| Chr 20            | 34129778     | 34145405   | 15628        | +             | ERGIC3         | Golgi to ER Vesicle<br>Transport                                              |
| Chr 22            | 23522552     | 23660224   | 137673       | +             | BCR            | Serine-Threonine<br>Kinase Activity and<br>GTPase-activating<br>Protein       |

**Supplemental Table 7****HML2 Consensus vs. Sham Vector – CD34+ Astroglia: Significantly Upregulated Pathways**

| <b>Pathways</b>                                            | <b>Enrichment</b> | <b>Activation Predicted By Z-Score</b> |
|------------------------------------------------------------|-------------------|----------------------------------------|
| <b>P Value</b>                                             |                   |                                        |
| ILK Signaling                                              | 0.0045            | ACTC1, DSP, IRS4, KRT18, LEF1, MYL1    |
| Transcriptional Regulatory Network in Embryonic Stem Cells | 0.0081            | CDX2, H4C14, H4C15                     |
| Ethanol Degradation IV                                     | 0.015             | ALDH1A2, GPX7                          |
| Dopamine Degradation                                       | 0.025             | ALDH1A2, SULT1A3/SULT1A4               |
| NAD Signaling Pathway                                      | 0.028             | H2BC12,H2BC15,H2BU1,POLR2A             |
| Phenylethylamine Degradation I                             | 0.030             | AOC2                                   |
| Immunogenic Cell Death Signaling Pathway                   | 0.032             | HSPA1A/HSPA1B,HSPA6,PYCARD             |
| BMP Signaling Pathway                                      | 0.032             | BMP3,HOXC9,SOSTDC1                     |
| VEGF Signaling                                             | 0.040             | ACTC1,FLT1,PTPN6                       |
| NER (Nucleotide Excision Repair, Enhanced Pathway)         | 0.046             | H4C14,H4C15,POLR2A                     |
| Tight Junction Signaling                                   | 0.048             | ACTC1,CGN,MYL1,OCN                     |

**Supplemental Table 8****HML2 Consensus vs. Sham Vector – CD34+ Astroglia: Significantly Upregulated Functions**

| <b>Pathways</b>                      | <b>Enrichment P Value</b> | <b>Z-Score</b> |
|--------------------------------------|---------------------------|----------------|
| Tumorigenesis of Epithelial Neoplasm | 0.000392                  | 0.205          |
| Transcription of DNA                 | 0.0000694                 | 1.365          |
| Proliferation of neuronal cells      | 0.00162                   | 0.392          |
| Organismal Death                     | 0.000000613               | -1.656         |
| Neoplasia of tumor cell lines        | 0.00359                   | 1.293          |
| Neoplasia of cells                   | 0.000257                  | 1.354          |
| Necrosis                             | 0.00000285                | -0.498         |
| Migration of Cells                   | 0.00000237                | 1.102          |
| Invasion of tumor cell lines         | 0.00365                   | 1.575          |
| Invasion of Cells                    | 0.0000417                 | 1.417          |
| Incidence of Tumor                   | 0.000125                  | 0.335          |
| Growth of Epithelial Tissue          | 0.000081                  | 0.902          |
| Generation of Tumor                  | 0.000393                  | 0.191          |
| Expression of RNA                    | 0.00076                   | 1.716          |
| Differentiation of Stem Cells        | 0.00223                   | -0.481         |

|                                        |            |        |
|----------------------------------------|------------|--------|
| Development of Malignant Tumor         | 0.000125   | 0.281  |
| Cell Viability                         | 0.000838   | 2.432  |
| Cell Transformation                    | 0.000131   | 1.092  |
| Cell Survival                          | 0.000964   | 2.513  |
| Cell Proliferation of Tumor Cell Lines | 0.00278    | 0.391  |
| Cell Movement                          | 0.00000459 | 1.235  |
| Cancer of Cells                        | 0.00401    | 1.884  |
| Apoptosis of Tumor Cell Lines          | 0.000134   | -0.161 |
| Advanced Malignant Tumor               | 0.00000071 | -0.065 |
| Activation of DNA Endogenous Promoter  | 0.000063   | 1.042  |



**Supplemental Table 9**

| <b>CRISPR-dCas9-HERV-K</b> | <b>Sequence</b>          |
|----------------------------|--------------------------|
| Sequence 1                 | GATAGGGAAAAACCGCCTTAAGGG |
| Sequence 2                 | AAAGCAGTATTGCTGCCCCGAGG  |
| Sequence 3                 | TCCTGCCTGTCCCTGGGCAATGG  |
| Sequence 4                 | AGTAGATGGAGCATACAATCGGG  |

**Supplemental Table 10****Primary Antibodies**

| <b>Target</b> | <b>Host</b> | <b>Use</b> | <b>Manufacturer/<br/>Product #</b> | <b>Dilution</b>                      |
|---------------|-------------|------------|------------------------------------|--------------------------------------|
| HERV-K Env    | Mouse       | WB, IF     | Austral Biologics<br>HERM 1855     | 1:500 (WB) 1:500 (IF)                |
| Nestin        | Mouse       | WB, IF     | Millipore Sigma<br>MAB5326         | 1:1000 (WB) 1:100 (IF)               |
| OCT4 (POUF1A) | Rabbit      | WB, IF     | Millipore Sigma<br>ABD116          | 1:1000(WB) IF(1:500)<br>1:1000(ChIP) |
| Sox-2         | Rat         | IF         | ThermoFisher<br>14-9811-82         | 1:100 (IF)                           |
| PCNA          | Mouse       | IF         | GeneTex<br>GTX40237                | 1:100 (IF)                           |
| Vimentin      | Chicken     | IF         | Millipore Sigma<br>AB5773          | 1:100 (IF)                           |
| S-100b        | Rabbit      | IF         | Novus Biologics<br>NBP1-87102      | 1:100 (IF)                           |
| GFAP          | Mouse       | IF         | BD Biosciences<br>556330           | 1:1000 (IF)                          |
| GAPDH         | Mouse       | WB         | Abcam<br>ab8245                    | 1:2000 (WB)                          |

**Supplemental Table 11**

| <b>Target</b> | <b>Primers 5'-3'</b>                                   |
|---------------|--------------------------------------------------------|
| HML-2 ENV     | F: CTGCCAAACCTGAGGAAGAA<br>R: ACCAACCAATTTTGGACTGC     |
| HML-2 POL     | F: TCACATGGAAACAGGCAAAA<br>R: AGGTACATGCGTGACATCCA     |
| HML-2 LTR5HS  | F: GTTTGTCTGCTGACCCTCTC<br>R: AGCCTCTGAGTTCCCTTAGT     |
| OCT4 (POU5F1) | F: GGTTCTCGATACTGGTTCGC<br>R: GTGGAGGAAGCTGACAACAA     |
| Nestin        | F: CAGCGTTGGAACAGAGGTTGG<br>R: TGGCACAGGTGTCTCAAGGGTAG |
| B-Actin       | F: ATCGAGCACGGCATCGTCA<br>R: AGCACAGCCTGGATAGCAAC      |

**Supplemental Table 12**

| <b>Target</b>                         | <b>Locus</b>                                                                                                                                                                                                                                                                                                                                                                                                                                                                                                                                                                                             |
|---------------------------------------|----------------------------------------------------------------------------------------------------------------------------------------------------------------------------------------------------------------------------------------------------------------------------------------------------------------------------------------------------------------------------------------------------------------------------------------------------------------------------------------------------------------------------------------------------------------------------------------------------------|
| HML-2 ENV PRIMER BINDING SITES (hg38) | chr16:34231555+34231672<br>chr19:22762054+22762171<br>chr22:18932768+18932885<br>chr1:160667209+160667326<br>chr1:75846546+75846663<br>chr3:125616011+125616128<br>chr3:101417265+101417382<br>chr10:101581695-101581812<br>chr12:58723722-58723839<br>chr19:36064850-36064967<br>chr19:28131005-28131122<br>chr21:19935424-19935541<br>chr1:207810924-207811041<br>chr1:155598937-155599054<br>chr3:112745597-112745714<br>chr3:9891839-9891956<br>chr5:156087197-156087314<br>chr5:30489232-30489349<br>chr6:78429134-78429248<br>chr7:4633041-4633158<br>chr7:4624537-4624654<br>chr8:7357877-7357994 |

**Supplemental Table 13****RNA-Scope Multiplex v2 Probes**

| <b>Target</b> | <b>Channel</b> | <b>Color</b> | <b>Dilution</b> |
|---------------|----------------|--------------|-----------------|
| HERV-K Env    | C1             | Green        | 1:1500          |
| Nestin        | C2             | Amber        | 1:1500          |
| OCT4 (POUF1A) | C3             | Red          | 1:1500          |

**Supplemental Table 14**

| Sample                                           | Figure | Statistical Test        |                                                                                                                |
|--------------------------------------------------|--------|-------------------------|----------------------------------------------------------------------------------------------------------------|
| HERV-K ENV RNA CSF                               | 1I     | Un-paired t-test        | 35.2±8.8 vs. 23.1±6.7, n=18, p=0.02, technical triplicates                                                     |
| HERV-K ENV RNA-tumor tissue                      | IJ     | Mann-Whitney Test       | 1.15±0.2 vs. 0.5±0.2, p=0.01, n=16, technical triplicates                                                      |
| HERV-K ENV qPCR-cell lines                       | 1K     | One-way ANOVA           | ANOVA, p<0.03, technical and biological triplicates                                                            |
| Summary expression of all HERV-K(HML-2) ORF loci | 2E-F   | One-way ANOVA           | p<0.001, Bonferroni Multiple-testing correction,                                                               |
| CRISPR-d-Cas9-HERV-K qPCR                        | 5B     | One-way ANOVA           | *p<0.05, **p<0.01, ***p<0.001, ****p<0.0001, technical and biological triplicates, multiple testing correction |
| Intracranial Patient-derived Xenograft Model     | 6J     | Log-rank (Kaplan-Meier) | OS: 26 days vs. 18.6, p=0.0008, n=10 per group                                                                 |
| Reverse Transcriptase in Extracellular Vesicles  | 7C     | One-way ANOVA           | p<0.001, biological and technical triplicates                                                                  |
| Abacavir effects on Reverse Transcriptase        | 7D     | One-way ANOVA           | *p<0.05, **p<0.01, biological and technical triplicates                                                        |
| HML2 consensus vs. sham vector – CD34+ astroglia | 6F     | Mann-Whitney Test       | 29.85±16.9 vs. 1.00±16.9, p<0.03, four replicates                                                              |
| HERV-K ENV                                       |        |                         |                                                                                                                |
| HML2 consensus vs. sham vector – CD34+ astroglia | 6F     | Mann-Whitney Test       | 1.86±0.2 vs. 1.00±0.2, p<0.03, four replicates                                                                 |
| OCT4                                             |        |                         |                                                                                                                |

## **Supplemental Methods**

### **Unbiased Clustering of HML-2 ORF expression**

All 72 HML-2 loci containing open reading frames (ORFs), along with stem cell signatures were included in an unbiased analysis of potential HML-2 markers. The Seurat function FindMarkers was used to identify differentially expressed HML-2 loci in OPC/AC and OPC clusters relative to MES1, MES2, and AC/MES1 clusters. Subsequently, HML-2 loci differentially expressed in all three comparison clusters (MES1, MES2, AC/MES1) were mapped using the Seurat function FeaturePlot.

### **Digital Droplet PCR**

The digital PCR reaction was set in 96-well plates in duplicate in an AutoDG Droplet Digital PCR System (Bio-Rad) with a set of primers and probe (FAM labeled) to detect HERV-K env (forward primer: 5' ATTTGGTGCCAGGAAGTCTGAG 3'; reverse primer: 5' GCTGTCTCTTCGGAGCTGTT 3' and probe 5' 6-FAM-AGGAGTTGCTGATGGCCTCG Iowa Black FQ 3'). For the analysis of CSF samples, to confirm the extracellular origin of HML-2 DNA in CSF, a pre-made assay of primers and probes targeting a cellular DNA (RPP30 gene, HEX-tagged) was also included (Bio-Rad, 10031244). For the analysis of HML-2 RNA in brain tissue and cell lines, HPRT1 was used as a reference gene (HEX-tagged, Bio-Rad pre-made assay, Catalogue number: 10031256). The master mix was composed of 12.5 µl of ddPCR Supermix (no dUTP) (Bio-Rad), 1.25 µl of a mix of HERV-K env primers (900 nm) and probe (250 nm) (Bio-Rad), 1.25 µl of RPP30 or HPRT1 assay (Bio-Rad), 2.5 µl of cDNA and 7.5 µl of RNase-free water. After preparing the droplets, the PCR was performed in a T100 Thermal cycler (Bio-Rad) with the following cycling conditions: 95°C for 10 minutes, 40 cycles of 95°C for 30 seconds and 60°C for 1 minute, and 95°C for 10 minutes. The number of copies was determined in a QX200 Digital PCR reader (Bio-Rad).

### **Chromatin Immunoprecipitation (ChIP)**

Prior to ChIP, GBM 28 and 43 were cultured according to methods above. Fifteen million cells were split and washed with PBS, centrifuged and resuspended in 10mL of fresh serum-free media. Cells were fixed by adding 18.5% paraformaldehyde to a final concentration of 1% for 10 minutes at room temperature. Cells were quenched using 1.25M of glycine and rocked at room temperature for 5 minutes. Cells were washed twice with DPBS, resuspended in the 1mL ChIP lysis buffer and

incubated on ice for 10 minutes. To isolate nuclei, cells were spun at 5000 RPM for 5 minutes at 4°C. Nuclei were then resuspended in 200 µL of the nuclear lysis buffer and incubated for 10 minutes on ice. To shear chromatin into ~500bp fragments, cells were sonicated for 10 seconds pulses (3x) at 30% power with 30 seconds rest on ice. Chromatin was centrifuged at 14,000 RPM for 10 minutes at 4°C, and supernatant was collected and diluted 1:5 in ChIP dilution buffer. 100 µL of this was transferred to another tube and stored in -80°C as input. Magnetic beads (Dynabeads, Invitrogen) were pre-washed (3x), and immunoprecipitated using 5 µg of non-specific IgG, RNA polymerase II, and anti-OCT-4. After overnight incubation, the beads were washed with a low salt buffer followed by a high salt buffer and Tris-HCL/EDTA buffer (3x for 3 minutes each). Elution buffer was added to samples and inputs and incubated for 30 minutes at 65°C shaking at 1000 RPM. To separate protein/DNA complex, proteinase K (20 mg/mL) was added for 2 hrs with shaking at 55°C. Phenol-chloroform extraction was performed. To precipitate DNA, 2µL of glycogen was added and samples were stored in -80°C overnight. Pellets were washed with ethanol and resuspended in nucleic acid-free H<sub>2</sub>O. Samples were quantified using RT-qPCR.

### **Supplemental Video 1**

HML-2 induces significant changes in cellular morphology and satellitosis. Images taken over 72 hours in 3D culture.
